# Supplementary material for: Anthropometric changes in children under 7 years old in Nanjing, China from 1995 to 2015
Source: Research Square preprint supplement (doi:10.21203/rs.3.rs-30850/v3), 2020-11-09
Supplement: Supplementary file 1 [file 197d51b59580470d2a12d4ce.xlsx]

## Sheet: Table 1
Table 1. The sample sizes of the surveys (1995, 2005 and 2015)
Age Group	1995					2005					2015
	urban		suburban			urban		suburban			urban		suburban
	Boys	Girls	Boys	Girls		Boys	Girls	Boys	Girls		Boys	Girls	Boys	Girls
Birth	178	167	172	157		166	169	168	177		207	191	-	-
1m～	198	200	219	232		197	187	134	135		218	219	213	182
2m～	231	209	211	192		177	182	101	97		212	190	152	129
3m～	189	197	205	214		184	195	142	135		215	212	211	209
4m～	209	196	207	191		196	189	153	147		208	204	109	103
5m～	201	189	198	203		190	188	139	124		189	210	176	149
6m～	190	187	220	215		214	194	158	176		218	210	214	209
8m～	212	211	209	176		207	205	154	151		211	211	210	213
10m～	189	207	183	178		194	186	154	126		211	218	215	211
12m～	190	216	230	207		204	200	165	150		204	210	209	209
15m～	197	209	200	219		190	194	181	166		207	215	187	185
18m～	173	198	165	159		188	188	185	162		210	211	210	200
21m～	189	200	173	163		187	181	145	149		208	188	206	169
2.0y～	200	190	202	228		185	191	201	204		199	189	216	209
2.5y～	210	200	187	220		183	179	232	241		191	200	211	224
3.0y～	199	199	215	201		200	200	184	179		211	223	213	214
3.5y～	178	187	179	176		189	198	246	205		208	221	221	214
4.0y～	190	197	191	181		207	203	150	165		211	212	208	210
4.5y～	223	221	198	209		194	203	228	173		210	204	217	204
5.0y～	209	212	186	186		201	198	173	161		221	210	212	211
5.5y～	206	208	197	209		197	200	202	167		203	228	207	209
6.0～7y	239	200	211	231		206	236	243	245		213	203	215	210

## Sheet: Table 2
Table 2. Information of some demographic, socioeconomic, and health funds in Nan Jing from 1995 to 2015
Characteristics	1995	2005	2015
Total population (million)	5.22	5.96	6.53
Birth rate (‰)	8.56	7.69	10.35
Natural increase rate (‰)	2.62	2.34	4.14
GDP (billion Yuan)	58.46	245.12	972.08
Proportion in three industrial sectors (％)
Agriculture	7.6	3.3	2.4
Industry	52.1	49.8	40.3
Services	40.3	46.9	57.3
GDP per captia (Yuan)	10887	40887	118171
Consumption per captia (Yuan)	4524	9593	43926
Health funds (billion Yuan)	-	0.998	7.254
Proportion of health funds (％)	-	3.16	6.94

## Sheet: Table 3
	Table 3. Body weight and length/height of urban and suburban boys in 1995, 2005 and 2015, and long-term changes from 1995 to 2015
Age Group	Boys (Urban)										Boys (Suburban)
	Weight(kg)					Length/Height(cm)					Weight(kg)					Length/Height(cm)
	1995	2005	2015	It(kg)		1995	2005	2015	It(cm)		1995	2005	2015	It(kg)		1995	2005	2015	It(cm)
Birth	3.41±0.38	3.34±0.40	3.47±0.38	0.06		50.9±1.8	50.7±1.8	50.3±1.1	-0.60 **		3.23±0.36	3.49±0.40	-	-		50.4±1.6	51.3±1.5	-	-
1m～	5.23±0.59	5.30±0.62	5.01±0.61	-0.22 **		57.2±1.9	57.9±2.3	56.7±2.1	-0.50 *		5.21±0.70	5.29±0.59	5.16±0.60	-0.05		57.2±2.4	57.4±2.1	57.1±2.0	-0.1
2m～	6.36±0.76	6.51±0.72	6.34±0.73	-0.02		60.8±2.2	61.4±2.3	60.6±2.2	-0.2		6.45±0.65	6.57±0.74	6.83±0.75	0.38 **		60.7±2.0	61.2±2.3	62.1±2.2	1.40 **
3m～	7.20±0.76	7.32±0.69	7.39±0.83	0.19 *		63.3±2.1	63.8±2.0	63.9±2.3	0.60 **		7.27±0.69	7.24±0.80	7.34±0.85	0.07		63.2±2.0	63.3±2.1	63.6±2.2	0.40 *
4m～	7.82±0.84	7.96±0.90	7.98±0.87	0.16 *		65.5±2.3	66.0±2.4	66.2±2.1	0.70 **		7.86±0.69	7.70±0.86	7.98±0.90	0.12		65.5±2.0	65.0±2.2	66.3±2.3	0.80 **
5m～	8.40±0.90	8.72±1.01	8.45±0.92	0.05		67.7±2.3	68.8±2.2	68.1±2.4	0.4		8.17±0.78	8.48±0.87	8.65±1.00	0.48 **		67.0±2.1	67.1±2.1	68.4±2.2	1.40 **
6m～	8.96±0.89	9.12±1.01	8.82±0.86	-0.14		69.7±2.3	70.5±2.4	69.9±2.1	0.2		8.56±0.69	8.79±1.01	8.93±1.04	0.37 **		69.7±2.0	69.2±2.3	70.0±2.4	0.3
8m～	9.45±0.97	9.62±0.97	9.46±1.09	0.01		72.5±2.3	73.4±2.4	72.7±2.2	0.2		9.21±0.70	9.45±1.04	9.53±1.15	0.32 **		71.5±2.2	72.2±2.2	72.6±2.4	1.10 **
10m～	9.96±1.01	10.20±1.06	10.23±1.15	0.27 *		74.8±2.4	76.0±2.8	75.8±2.5	1.00 **		9.51±0.75	9.96±1.02	10.35±1.08	0.84 **		73.7±2.5	74.8±2.5	76.0±2.5	2.30 **
12m～	10.33±0.89	11.07±1.21	10.63±1.22	0.30 **		77.7±2.8	79.6±2.9	77.9±2.6	0.2		9.99±0.86	10.10±1.00	10.50±1.11	0.51 **		76.3±2.2	77.2±2.5	78.2±2.5	1.90 **
15m～	10.98±1.03	11.51±1.27	11.24±1.08	0.26 *		80.9±2.5	82.5±3.1	82.1±3.0	1.20 **		10.29±0.79	10.88±1.10	11.44±1.18	1.15 **		78.5±2.5	80.7±2.8	82.3±2.7	3.80 **
18m～	11.53±1.03	11.98±1.25	11.83±1.24	0.30 *		83.3±2.7	84.7±2.9	84.7±3.0	1.40 **		10.93±0.81	11.60±1.31	11.91±1.31	0.98 **		81.7±2.3	83.4±3.2	84.7±2.8	3.00 **
21m～	12.14±1.20	13.01±1.42	12.79±1.45	0.65 **		86.2±3.0	88.6±3.3	88.1±3.2	1.90 **		11.50±0.87	12.17±1.14	13.02±1.42	1.52 **		84.0±2.5	86.2±3.0	88.3±3.2	4.30 **
2.0y～	12.92±1.29	13.61±1.36	13.40±1.55	0.48 **		90.2±3.5	92.1±3.6	91.2±3.3	1.00 **		12.21±1.04	13.02±1.29	13.58±1.56	1.37 **		86.4±3.2	90.4±3.6	91.8±3.5	5.40 **
2.5y～	13.67±1.30	14.52±1.59	14.57±1.65	0.90 **		94.1±3.4	96.0±4.0	96.2±3.4	2.10 **		13.37±1.04	14.23±1.65	14.84±1.83	1.47 **		90.9±3.5	93.9±3.5	96.3±3.6	5.40 **
3.0y～	14.57±1.41	15.97±1.69	16.23±2.11	1.66 **		97.1±3.7	100.5±3.8	100.9±3.8	3.80 **		14.27±1.10	15.08±1.50	16.19±2.04	1.92 **		95.2±3.1	97.7±3.6	100.1±3.8	4.90 **
3.5y～	15.84±1.46	17.19±2.14	17.27±2.30	1.43 **		100.9±3.8	104.3±3.9	104.3±4.1	3.40 **		14.93±1.23	15.82±1.75	17.00±2.06	2.07 **		97.9±3.5	100.9±3.8	103.7±4.4	5.80 **
4.0y～	16.67±1.62	17.99±2.20	18.40±2.36	1.73 **		104.3±3.7	107.3±4.5	108.1±4.2	3.80 **		15.91±1.10	16.82±1.81	18.08±2.49	2.17 **		101.2±3.4	104.6±4.0	107.1±3.9	5.90 **
4.5y～	17.68±1.84	19.29±2.31	19.53±2.39	1.85 **		107.9±4.0	110.6±4.4	111.6±4.4	3.70 **		16.42±1.22	17.72±1.95	19.27±2.64	2.85 **		104.2±3.6	107.4±4.0	110.4±4.8	6.20 **
5.0y～	18.95±2.11	20.43±2.78	21.20±2.74	2.25 **		111.8±3.8	114.1±4.3	115.6±4.3	3.80 **		17.49±1.32	18.57±2.19	20.61±3.09	3.12 **		107.3±3.9	111.0±4.1	114.0±4.9	6.70 **
5.5y～	19.93±2.19	22.25±3.02	22.50±3.43	2.57 **		115.0±3.7	117.6±4.4	118.0±4.5	3.00 **		18.00±1.30	20.07±2.87	21.69±3.48	3.69 **		110.3±3.7	114.3±4.9	116.8±4.8	6.50 **
6.0～7y	21.74±2.64	23.16±3.08	24.74±3.87	3.00 **		119.1±4.4	120.7±4.2	122.1±4.8	3.00 **		19.42±1.69	21.24±2.81	23.57±3.68	4.15 **		114.4±4.0	118.2±4.8	121.8±4.8	7.40 **
Note. It: total increments from 1995 to 2015; t‐test: *P < 0.05, **P < 0.01

## Sheet: Table 4
	Table 4. Body weight and length/height of urban and suburban girls in 1995, 2005 and 2015, and long-term changes from 1995 to 2015
Age Group	Girls (Urban )										Girls (Suburban)
	Weight(kg)					Length/Height(cm)					Weight(kg)					Length/Height(cm)
	1995	2005	2015	It(kg)		1995	2005	2015	It(cm)		1995	2005	2015	It(kg)		1995	2005	2015	It(cm)
Birth	3.30±0.38	3.23±0.37	3.37±0.35	0.07		50.5±1.7	49.8±1.8	50.0±1.2	-0.50 **		3.14±0.33	3.37±0.41	-	-		49.9±1.7	50.5±1.5	-	-
1m～	4.88±0.54	4.95±0.56	4.61±0.54	-0.27 **		56.3±2.0	56.9±1.8	55.4±1.9	-0.90 **		4.90±0.56	4.90±0.53	4.84±0.52	-0.06		56.2±2.2	56.4±2.0	56.2±1.8	0
2m～	5.84±0.65	6.03±0.69	5.85±0.67	0.01		59.5±2.1	59.9±2.3	59.5±2.1	0		5.69±0.59	6.05±0.62	6.24±0.67	0.55 **		58.8±2.0	59.5±2.2	60.8±2.3	2.00 **
3m～	6.50±0.66	6.80±0.72	6.71±0.74	0.21 **		61.7±2.0	62.6±2.0	62.4±2.0	0.70 **		6.50±0.58	6.65±0.71	6.71±0.67	0.21 **		61.6±1.7	62.1±1.8	62.0±1.9	0.40 *
4m～	7.22±0.78	7.39±0.88	7.26±0.80	0.04		64.2±2.2	64.6±2.2	64.7±1.9	0.5		7.10±0.73	7.13±0.86	7.40±0.86	0.30 **		63.1±2.2	63.4±2.2	64.8±2.0	1.70 **
5m～	7.66±0.73	7.94±0.92	7.76±0.82	0.1		65.6±2.0	66.9±2.4	66.3±2.3	0.70 **		7.56±0.71	7.72±0.82	8.01±0.93	0.45 **		65.1±2.1	65.5±2.2	67.0±2.1	1.90 **
6m～	8.25±0.91	8.45±0.91	8.19±0.87	-0.06		68.3±2.3	68.9±2.3	68.1±2.3	-0.2		7.90±0.66	8.25±0.98	8.34±0.90	0.44 **		66.9±2.0	67.6±2.6	68.3±2.2	1.40 **
8m～	8.87±0.91	9.06±0.96	8.99±0.98	0.12		70.9±2.2	71.7±2.5	71.6±2.5	0.70 **		8.64±0.75	8.97±1.01	8.90±0.97	0.26 **		70.0±1.9	70.9±2.5	71.2±2.3	1.20 **
10m～	9.27±0.98	9.65±1.08	9.43±0.94	0.16		73.5±2.6	74.7±3.1	74.0±2.3	0.50 *		8.88±0.74	9.38±1.00	9.63±1.02	0.75 **		72.6±2.3	73.8±2.4	74.7±2.5	2.10 **
12m～	9.65±0.97	10.10±1.08	9.77±1.09	0.12 **		76.1±2.7	77.2±2.7	76.3±2.7	0.2		9.42±0.72	9.75±1.02	9.89±0.95	0.47 **		75.1±2.1	76.0±2.5	76.6±2.4	1.50 **
15m～	10.32±1.01	10.87±1.14	10.55±1.12	0.23 *		79.6±2.5	81.1±2.8	80.9±2.7	1.30 **		9.77±0.77	10.31±1.14	10.76±1.14	0.99 **		77.4±2.2	79.2±2.8	81.1±2.8	3.70 **
18m～	10.76±1.00	11.39±1.23	11.20±1.13	0.44 **		81.8±2.7	83.8±3.1	83.4±3.0	1.60 **		10.37±0.83	11.00±1.13	11.15±1.20	0.78 **		79.5±2.5	82.3±2.8	83.2±2.8	3.70 **
21m～	11.57±1.04	12.26±1.28	12.07±1.38	0.50 **		85.4±2.9	86.9±2.9	86.7±3.4	1.30 **		10.85±0.83	11.66±1.26	12.15±1.28	1.30 **		82.7±2.8	85.1±3.3	86.9±3.1	4.20 **
2.0y～	12.17±1.21	13.01±1.56	12.53±1.34	0.36 **		88.4±3.1	90.7±3.6	89.7±3.2	1.30 **		12.10±0.83	12.34±1.27	12.84±1.50	0.74 **		86.7±2.5	88.7±3.2	90.3±3.2	3.60 **
2.5y～	13.09±1.20	14.19±1.64	13.91±1.66	0.82 **		92.8±3.3	95.2±4.0	95.2±3.8	2.40 **		12.52±0.95	13.45±1.43	14.13±1.78	1.61 **		89.0±3.1	92.5±3.2	95.0±3.6	6.00 **
3.0y～	14.23±1.33	15.42±1.76	15.18±1.71	0.95 **		96.3±3.0	99.0±3.8	99.1±3.6	2.80 **		13.81±0.97	14.40±1.63	15.06±1.98	1.25 **		93.6±2.9	96.4±3.7	98.1±3.9	4.50 **
3.5y～	15.26±1.43	16.44±1.90	16.4±1.84	1.22 **		99.7±3.5	102.4±3.5	103.3±3.7	3.60 **		14.34±0.99	15.29±1.76	16.27±1.92	1.93 **		96.6±2.9	99.5±3.8	102.0±3.8	5.40 **
4.0y～	16.21±1.69	17.57±2.02	17.48±2.39	1.27 **		103.3±4.0	106.1±3.9	106.3±4.2	3.00 **		15.48±1.33	16.18±1.92	17.53±2.47	2.05 **		100.5±3.4	103.4±3.7	106.1±4.6	5.60 **
4.5y～	17.24±1.90	18.54±2.19	18.66±2.33	1.42 **		106.9±4.2	109.6±4.3	110.1±4.5	3.20 **		16.21±1.10	17.02±2.07	18.51±2.43	2.30 **		103.1±3.6	106.2±4.5	109.3±4.2	6.20 **
5.0y～	18.36±1.72	19.98±2.71	20.21±2.81	1.85 **		111.0±3.8	113.0±4.3	114.0±4.2	3.00 **		17.11±1.44	18.29±2.38	19.84±2.95	2.73 **		106.5±3.8	110.2±4.3	112.8±4.4	6.30 **
5.5y～	19.34±2.17	21.21±2.87	20.87±2.68	1.53 **		113.8±4.2	116.6±4.1	116.7±4.1	2.90 **		17.84±1.36	18.79±2.39	20.69±3.08	2.85 **		109.5±4.0	112.2±4.2	115.6±4.3	6.10 **
6.0～7y	20.52±2.22	22.62±3.03	22.70±3.37	2.18 **		117.7±4.3	119.8±4.8	120.4±4.8	2.70 **		19.20±1.55	20.21±2.79	22.15±3.21	2.95 **		114.4±3.9	116.7±4.9	120.3±4.6	5.90 **
Note. It: total increments from 1995 to 2015; t‐test: *P < 0.05, **P < 0.01

## Sheet: Table 5
Table 5. The urban-suburban difference in body weight and length/height of boys and girls in 1995, 2005 and 2015
Age Group	Boys								Girls
	Weight(kg)				Height(cm)				Weight(kg)				Height(cm)
	1995	2005	2015		1995	2005	2015		1995	2005	2015		1995	2005	2015
	Dt(kg)	Dt(kg)	Dt(kg)		Dt(cm)	Dt(cm)	Dt(cm)		Dt(kg)	Dt(kg)	Dt(kg)		Dt(cm)	Dt(cm)	Dt(cm)
Birth	0.18 **	-0.15 **	-		0.50 **	-0.60 **	-		0.16 **	-0.14 **	-		0.60 **	-0.70 **	-
1m～	0.02	0.01	-0.15 *		0	0.50 *	-0.40 *		-0.02	0.05	-0.23 **		0.1	0.50 *	-0.80 **
2m～	-0.09	-0.06	-0.49 **		0.1	0.2	-1.50 **		0.15 *	-0.02	-0.39 **		0.70 **	0.4	-1.30 **
3m～	-0.07	0.08	0.05		0.1	0.50 *	0.3		0	0.15 *	0		0.1	0.50 *	0.40 *
4m～	-0.04	0.26 *	0		0	1.00 **	-0.1		0.12	0.26 **	-0.14		1.10 **	1.20 **	-0.1
5m～	0.23 **	0.24 *	-0.20 *		0.70 **	1.70 **	-0.3		0.1	0.22 *	-0.25 **		0.50 **	1.40 **	-0.70 **
6m～	0.40 **	0.33 **	-0.11		0	1.30 **	-0.1		0.35 **	0.20 *	-0.15		1.40 **	1.30 **	-0.2
8m～	0.24 **	0.17	-0.07		1.00 **	1.20 **	0.1		0.23 **	0.09	0.09		0.90 **	0.80 **	0.4
10m～	0.45 **	0.24 *	-0.12		1.10 **	1.20 **	-0.2		0.39 **	0.27 *	-0.20 *		0.90 **	0.90 **	-0.7
12m～	0.34 **	0.97 **	0.13		1.40 **	2.40 **	-0.3		0.23 **	0.35 **	-0.12		1.00 **	1.20 **	-0.3
15m～	0.69 **	0.63 **	-0.2		2.40 **	1.80 **	-0.2		0.55 **	0.56 **	-0.21		2.20 **	1.90 **	-0.2
18m～	0.60 **	0.38 **	-0.08		1.60 **	1.30 **	0		0.39 **	0.39 **	0.05		2.30 **	1.50 **	0.2
21m～	0.64 **	0.84 **	-0.23		2.20 **	2.40 **	-0.2		0.72 **	0.60 **	-0.08		2.70 **	1.80 **	-0.2
2.0y～	0.71 **	0.59 **	-0.18		3.80 **	1.70 **	-0.6		0.07	0.67 **	-0.31 *		1.70 **	2.00 **	-0.6
2.5y～	0.30 *	0.29 *	-0.27		3.20 **	2.10 **	-0.1		0.57 **	0.74 **	-0.22		3.80 **	2.70 **	0.2
3.0y～	0.30 *	0.89 **	0.04		1.90 **	2.80 **	0.80 *		0.42 **	1.02 **	0.12		2.70 **	2.60 **	1.00 **
3.5y～	0.91 **	1.37 **	0.27		3.00 **	3.40 **	0.6		0.92 **	1.15 **	0.21		3.10 **	2.90 **	1.30 **
4.0y～	0.76 **	1.17 **	0.32		3.10 **	2.70 **	1.00 *		0.73 **	1.39 **	-0.05		2.80 **	2.70 **	0.2
4.5y～	1.26 **	1.57 **	0.26		3.70 **	3.20 **	1.20 **		1.03 **	1.52 **	0.15		3.80 **	3.40 **	0.8
5.0y～	1.46 **	1.86 **	0.59 *		4.50 **	3.10 **	1.60 **		1.25 **	1.69 **	0.37		4.50 **	2.80 **	1.20 **
5.5y～	1.93 **	2.18 **	0.81 *		4.70 **	3.30 **	1.20 **		1.50 **	2.42 **	0.18		4.30 **	4.40 **	1.10 **
6.0～7y	2.32 **	1.92 **	1.17 **		4.70 **	2.50 **	0.3		1.32 **	2.41 **	0.55		3.30 **	3.10 **	0.1
Note. It: total difference between urban and suburban areas; t‐test: *P < 0.05, **P < 0.01

## Sheet: Table 6
Table 6. Head circumference of urban and suburban children in 1995, 2005 and 2015, and long-term changes from 1995 to 2015
Age Group	Boys										Girls
	Urban					Suburban					Urban					Suburban
	1995	2005	2015	It(cm)		1995	2005	2015	It(cm)		1995	2005	2015	It(cm)		1995	2005	2015	It(cm)
Birth	34.5±0.9	34.6±1.0	34.1±1.3	-0.40 **		34.1±0.8	34.3±1.4	-	-		34.2±1.1	34.1±1.1	33.7±1.2	-0.50 **		33.8±0.9	33.9±1.4	-	-
1m～	38.1±1.2	38.4±1.2	37.8±1.1	-0.30 **		38.1±1.1	38.0±1.1	38.0±1.1	-0.1		37.5±1.1	37.5±1.0	36.9±1.2	-0.60 **		37.4±1.0	37.3±1.0	37.3±1.1	-0.1
2m～	39.8±1.2	40.1±1.2	39.7±1.2	-0.1		39.8±1.0	40.0±1.2	40.3±1.1	0.50 **		38.9±1.1	38.8±1.1	38.7±1.1	-0.2		38.9±0.9	38.9±1.1	39.4±1.1	0.50 **
3m～	41.1±1.2	41.1±1.1	41.2±1.2	0.1		41.1±1.1	41.2±1.2	41.1±1.1	0		40.0±1.1	40.2±1.1	40.0±1.1	0		40.0±1.0	40.2±1.0	39.9±1.0	-0.1
4m～	42.4±1.1	42.3±1.3	42.2±1.2	-0.2		42.0±0.9	42.1±1.1	42.1±1.2	0.1		41.3±1.1	41.2±1.2	41.0±1.1	-0.30 **		40.9±0.9	41.2±1.2	41.0±1.1	0.1
5m～	43.3±1.1	43.5±1.2	43.1±1.2	-0.2		42.9±0.8	43.4±1.1	43.1±1.2	0.2		42.2±1.1	42.4±1.2	41.9±1.1	-0.30 **		42.0±0.9	42.1±1.2	42.1±1.2	0.1
6m～	44.4±1.0	44.5±1.2	43.9±1.1	-0.50 **		44.1±0.9	44.3±1.3	44.1±1.3	0		43.2±1.3	43.3±1.2	42.6±1.2	-0.60 **		42.8±0.7	43.2±1.3	42.9±1.2	0.1
8m～	45.4±1.1	45.6±1.3	45.1±1.3	-0.3		45.0±1.0	45.5±1.2	45.1±1.3	0.1		44.3±1.2	44.3±1.2	44.0±1.3	-0.30 *		44.0±1.0	44.2±1.1	43.9±1.3	-0.1
10m～	46.0±1.3	46.2±1.3	46.0±1.3	0		45.7±1.1	46.2±1.2	46.1±1.3	0.40 **		44.8±1.1	45.1±1.4	44.7±1.2	-0.1		44.7±0.8	44.9±1.1	44.8±1.3	0.1
12m～	46.7±1.2	47.1±1.4	46.6±1.3	-0.1		46.3±1.0	46.3±1.2	46.4±1.2	0.1		45.3±1.2	45.5±1.2	45.3±1.3	0		45.1±0.8	45.5±1.1	45.2±1.2	0.1
15m～	47.1±1.1	47.6±1.3	47.1±1.1	0		46.6±1.0	47.2±1.2	47.2±1.2	0.60 **		46.1±1.2	46.4±1.2	46.1±1.2	0		45.6±0.9	46.1±1.2	46.0±1.2	0.40 **
18m～	47.6±1.2	48.0±1.2	47.8±1.4	0.2		47.1±1.1	47.8±1.2	47.5±1.4	0.40 **		46.7±1.1	46.8±1.3	46.8±1.2	0.1		46.2±0.9	46.6±1.2	46.4±1.2	0.2
21m～	48.1±1.1	48.6±1.1	48.3±1.2	0.2		47.5±0.6	48.1±1.2	48.3±1.3	0.80 **		47.1±1.1	47.4±1.2	47.3±1.3	0.2		46.7±1.0	47.1±1.2	47.2±1.3	0.50 **
2.0y～	48.7±1.2	49.0±1.3	48.7±1.3	0		48.1±1.2	48.9±1.3	48.5±1.3	0.40 **		47.5±1.1	47.8±1.2	47.6±1.2	0.1		47.0±0.9	47.5±1.3	47.5±1.4	0.50 **
2.5y～	49.0±1.1	49.5±1.2	49.1±1.4	0.1		48.4±1.0	49.3±1.2	49.3±1.3	0.90 **		48.1±1.2	48.6±1.3	48.2±1.3	0.1		47.4±0.9	48.1±1.2	48.1±1.3	0.70 **
Note. It: total increments from 1995 to 2015; t‐test: *P < 0.05, **P < 0.01
									\
